# Supplementary material for: Systematic Cell-Based Phenotyping of Missense Alleles Empowers Rare Variant Association Studies: A Case for LDLR and Myocardial Infarction
Source: PLoS Genet. 2015 Feb 3;11(2):e1004855. doi: 10.1371/journal.pgen.1004855 (PMC4409815; doi:10.1371/journal.pgen.1004855)
Supplement: S1 Spreadsheet — (XLSX) [file pgen.1004855.s019.xlsx]

## Sheet: Thormaehlen_Spreadsheet1
Spreadsheet 1
Comprehensive results for all 79 LDLR missense variants functionally characterized in this study by overexpression and complementation for a role on cellular LDL-uptake
oe, overexpression; for definition of parameters, see Methods and Blattmann et al., 2013; note for wild-type LDLR’-WT that quantifications were performed in 6 different bins from cells below the upper threshold (in %) of maximal GFP expression in a sample (see also blue-shaded columns in Figure S1 and Methods).
				oe_"total LDL signal"							oe_"LDL concentration"						oe_"seg. number"						oe_"seg. area"					oe
source	LDLR exon	ClinVar Accession	amino acid chg	n (exp.)	Mean	SD	SEM	T-Test LDLR	T-Test GFP	n (exp.)	Mean	SD	SEM	T-Test LDLR	T-Test GFP	n (exp.)	Mean	SD	SEM	T-Test LDLR	T-Test GFP	n (exp.)	Mean	SD	SEM	T-Test LDLR	T-Test GFP	"GFP expression"
control	NA	NA	GFP-ctrl	31	0.962395	0.180697	0.0324542	8.21843e-23	NA	31	0.967663	0.105096	0.0188758	5.94501e-26	NA	31	0.994634	0.102034	0.0183259	8.46421e-11	NA	31	0.977575	0.125625	0.0225629	3.77082e-18	NA	1.65194
LDLR'-WT(10)	NA	NA	LDLR {0-10%}	19	1.08801	0.16878	0.0387207	NA	0.0181953	19	1.06923	0.0872801	0.0200234	NA	0.000931917	19	0.970113	0.078293	0.0179616	NA	0.374261	19	0.987125	0.0921082	0.0211311	NA	0.775365	0.1
LDLR'-WT(20)	NA	NA	LDLR {0-20%}	32	1.57304	0.275656	0.0487296	NA	4.47828e-15	32	1.28723	0.110088	0.019461	NA	2.35822e-17	32	1.04292	0.0710006	0.0125513	NA	0.0326422	32	1.14976	0.118527	0.0209528	NA	5.4863e-07	0.2
LDLR'-WT(30)	NA	NA	LDLR {0-30%}	36	1.84611	0.330919	0.0551532	NA	3.81438e-20	36	1.3854	0.119604	0.0199339	NA	6.88082e-23	36	1.075	0.0779582	0.012993	NA	0.00052547	36	1.2335	0.128108	0.0213513	NA	1.15652e-11	0.3
LDLR'-WT(50)	NA	NA	LDLR {0-50%}	36	2.16396	0.452062	0.0753436	NA	4.36336e-21	36	1.45995	0.14266	0.0237766	NA	5.0566e-24	36	1.12623	0.0903905	0.0150651	NA	4.69468e-07	36	1.33965	0.15715	0.0261917	NA	2.70965e-15	0.5
LDLR'-WT(70)	NA	NA	LDLR {0-70%}	33	2.2998	0.496743	0.0864719	NA	4.69981e-21	33	1.48769	0.14256	0.0248164	NA	2.16138e-24	33	1.16261	0.0978302	0.01703	NA	6.46319e-09	33	1.39238	0.169031	0.0294246	NA	2.40089e-16	0.7
LDLR'-WT(100)	NA	NA	LDLR {0-100%}	37	2.30603	0.473205	0.0777945	NA	8.21843e-23	37	1.47964	0.135994	0.0223573	NA	5.94501e-26	37	1.17562	0.091263	0.0150035	NA	8.46421e-11	37	1.40783	0.164277	0.027007	NA	3.77082e-18	1
ATVB	1	SCV000189524	G20R	3	2.35387	0.396018	0.228641	0.866682	7.5093e-13	3	1.36333	0.0827956	0.0478021	0.155563	4.54412e-07	3	1.20306	0.100571	0.0580646	0.621337	0.00191616	3	1.50016	0.194765	0.112448	0.360036	1.95197e-07	0.328893
ATVB	2	SCV000189525	G48D	4	2.58626	0.22183	0.110915	0.24631	4.73939e-18	4	1.55206	0.0988085	0.0494043	0.30374	2.31886e-12	4	1.2056	0.0747945	0.0373973	0.516435	0.000302024	4	1.51191	0.12426	0.0621302	0.221585	1.66139e-09	0.98052
ATVB	2	SCV000189526	T62M	4	2.16934	0.503079	0.251539	0.583254	9.85372e-12	4	1.46399	0.149829	0.0749144	0.824655	4.8579e-10	4	1.14146	0.0728183	0.0364091	0.47787	0.00836798	4	1.31363	0.190284	0.0951421	0.282194	2.64237e-05	1.28864
ATVB	3	SCV000189527	R81C	3	1.8796	0.208029	0.120105	0.133313	1.70343e-09	3	1.32946	0.0821412	0.0474243	0.069034	2.15129e-06	3	1.09245	0.0390647	0.022554	0.128997	0.113	3	1.26845	0.081882	0.0472746	0.157459	0.000463247	0.4505
exome chip	3	SCV000189619	E101K	4	1.42173	0.170776	0.0853878	0.000714727	3.24377e-05	4	1.07485	0.060826	0.030413	8.70101e-07	0.0560435	4	0.967045	0.0848743	0.0424371	9.06274e-05	0.609139	4	1.10343	0.0891711	0.0445855	0.000836932	0.0622714	0.804765
ATVB	4	SCV000189528	P105L	3	2.42051	0.235283	0.135841	0.683841	2.25943e-14	3	1.45671	0.0279537	0.0161391	0.774704	4.74809e-09	3	1.21892	0.0434669	0.0250956	0.424664	0.000738346	3	1.48121	0.118828	0.0686051	0.455689	1.66533e-07	0.388184
ATVB	4	SCV000189529	D118Y	4	1.89211	0.24647	0.123235	0.105631	2.26978e-10	4	1.31853	0.147014	0.073507	0.0348414	9.96061e-07	4	1.11675	0.0896115	0.0448058	0.240051	0.0471683	4	1.29699	0.126512	0.0632559	0.217963	9.50843e-05	1.03776
ATVB	4	SCV000189530	D131G	3	1.33745	0.0178094	0.0102823	0.00119842	0.00123555	3	1.13404	0.0423917	0.0244749	0.000102416	0.0112695	3	1.05052	0.0466176	0.0269147	0.0252695	0.35974	3	1.10223	0.0345018	0.0199196	0.00292932	0.100629	0.478635
ATVB	4	SCV000189531	G137S	4	2.16676	0.24477	0.122385	0.56314	4.51508e-14	4	1.49199	0.142214	0.0711069	0.864878	1.05843e-10	4	1.16885	0.0765634	0.0382817	0.897012	0.00217701	4	1.35019	0.0398251	0.0199126	0.487108	1.05327e-06	1.34572
ATVB	4	SCV000189532	G137V	4	1.32823	0.129208	0.0646039	0.000174421	0.000344417	4	1.15017	0.0555151	0.0277576	2.23223e-05	0.00162171	4	1.07231	0.0330886	0.0165443	0.0299539	0.14735	4	1.10287	0.07618	0.03809	0.00066005	0.0606014	1.25448
exome chip	4	SCV000189620	D168N	3	1.40058	0.27386	0.158113	0.00246039	0.000522001	3	1.17399	0.108827	0.0628313	0.000539289	0.00279025	3	1.03575	0.0652086	0.0376482	0.0136467	0.501962	3	1.12117	0.123998	0.0715901	0.00555535	0.0675658	1.05705
ATVB	4	SCV000189533	S177L	4	1.23694	0.0960115	0.0480058	6.79282e-05	0.00568855	4	1.08768	0.0551493	0.0275747	1.53114e-06	0.0331109	4	1.02653	0.0425662	0.0212831	0.00271929	0.544809	4	1.06117	0.0568169	0.0284084	0.00017324	0.202455	1.12468
ATVB	4	SCV000189534	P181R	4	2.12912	0.811336	0.405668	0.511223	1.99521e-08	4	1.5505	0.359434	0.179717	0.417703	1.53387e-08	4	1.26567	0.192763	0.0963813	0.103745	7.94475e-05	4	1.31079	0.256555	0.128277	0.293495	0.000107117	4.06432
ATVB	4	SCV000189535	Q182R	5	2.00579	0.117638	0.0526092	0.150419	5.52292e-15	5	1.40154	0.0826832	0.036977	0.222461	1.75574e-10	5	1.13787	0.0735452	0.0328904	0.376164	0.00475978	5	1.34662	0.118353	0.0529293	0.366255	3.00271e-07	1.26706
ATVB	4	SCV000189536	C197R	4	1.17516	0.106802	0.0534011	2.30867e-05	0.0252053	4	1.05317	0.0518025	0.0259012	2.28799e-07	0.108003	4	1.0194	0.0202757	0.0101378	0.00146093	0.653418	4	1.03948	0.0473515	0.0236757	6.19993e-05	0.344621	1.14566
exome chip	4	SCV000189621	G219D	3	2.70471	0.374897	0.216447	0.164896	1.24147e-15	3	1.70457	0.0203855	0.0117696	0.00741722	2.38405e-13	3	1.22614	0.140698	0.0812321	0.378858	0.00092324	3	1.51915	0.256562	0.148126	0.283258	2.47438e-07	0.868226
ATVB	4	SCV000189537	D221G	3	1.27501	0.0378229	0.0218371	0.000628735	0.00588717	3	1.12754	0.014205	0.00820125	7.73663e-05	0.0140942	3	1.08169	0.0529139	0.0305499	0.0890117	0.15834	3	1.11259	0.0279243	0.0161221	0.00390489	0.0761479	0.733051
ATVB	4	SCV000189538	C222Y	4	1.0579	0.107849	0.0539247	4.87125e-06	0.291343	4	0.996662	0.0539186	0.0269593	1.66401e-08	0.588745	4	1.0122	0.0185181	0.00925904	0.000872123	0.704884	4	1.00955	0.0650934	0.0325467	1.98289e-05	0.592786	0.859594
ATVB, exome chip	5	SCV000189539	R237H	3	3.10807	0.554706	0.32026	0.00811043	9.62597e-17	3	1.64118	0.146179	0.0843965	0.0560818	1.08838e-11	3	1.33797	0.120349	0.0694833	0.00605296	4.65928e-06	3	1.65619	0.233384	0.134745	0.0188389	1.66458e-09	2.81405
exome chip	5	SCV000189622	R253W	3	2.49158	0.311889	0.180069	0.511862	1.69681e-14	3	1.50107	0.0855407	0.049387	0.791142	1.07544e-09	3	1.18899	0.00895106	0.0051679	0.803418	0.00269544	3	1.50427	0.11793	0.068087	0.32808	6.96284e-08	0.827185
ATVB	5	SCV000189540	M264L	4	2.17838	0.481618	0.240809	0.597782	5.00417e-12	4	1.48131	0.191556	0.0957782	0.969071	8.52333e-10	4	1.14088	0.0868792	0.0434396	0.46986	0.00977755	4	1.32493	0.209375	0.104688	0.329578	2.43398e-05	1.32978
exome chip	5	SCV000189623	D266E	3	1.7572	0.24977	0.144205	0.0562173	5.02116e-08	3	1.29814	0.0786308	0.0453975	0.0294107	8.96164e-06	3	1.12369	0.0337707	0.0194975	0.338073	0.0389963	3	1.25783	0.136414	0.0787588	0.133415	0.000878412	1.1712
ATVB, exome chip	5	SCV000189541	G269D	3	2.51391	0.189683	0.109513	0.459365	2.50784e-15	3	1.53641	0.0345697	0.0199588	0.480169	1.62947e-10	3	1.13696	0.0958008	0.0553106	0.485849	0.0271502	3	1.47538	0.165275	0.0954214	0.497632	3.3402e-07	0.844215
ATVB	6	SCV000189542	C276S	4	1.37649	0.137123	0.0685617	0.000324077	7.99801e-05	4	1.14264	0.0573702	0.0286851	1.53141e-05	0.00225944	4	1.06985	0.0473459	0.0236729	0.0255104	0.151509	4	1.12214	0.0884682	0.0442341	0.00130622	0.0326594	0.867197
ATVB, exome chip	6	SCV000189543	E277K	3	2.17013	0.258192	0.149067	0.628407	4.11402e-12	3	1.46788	0.101717	0.0587262	0.884793	5.32807e-09	3	1.11973	0.0352997	0.0203803	0.303217	0.0450405	3	1.32224	0.102162	0.0589833	0.383197	6.58436e-05	0.937024
ATVB	6	SCV000189544	F282L	4	1.12122	0.0721676	0.0360838	1.09944e-05	0.087452	4	1.0356	0.0605599	0.03028	1.06795e-07	0.196199	4	1.0158	0.0731603	0.0365801	0.00139244	0.684858	4	1.03379	0.0332781	0.016639	4.63218e-05	0.390389	0.880612
ATVB	6	SCV000189545	H285Y	5	2.06935	0.372603	0.166633	0.30225	3.21166e-13	5	1.41689	0.117599	0.052592	0.315255	8.55503e-11	5	1.12093	0.0663591	0.0296767	0.205789	0.0231207	5	1.31926	0.178075	0.0796376	0.304624	7.20873e-06	0.902067
ATVB	6	SCV000189546	M298V	3	2.50306	0.583798	0.337056	0.498545	1.37121e-12	3	1.54452	0.107198	0.0618905	0.427146	2.35655e-10	3	1.165	0.0562104	0.0324531	0.844877	0.00810192	3	1.42168	0.187898	0.108483	0.889915	3.14908e-06	0.87993
ATVB	6	SCV000189547	R303Q	4	2.11415	0.277409	0.138705	0.502211	2.79226e-13	4	1.6313	0.183392	0.0916959	0.0428762	1.18458e-12	4	1.08709	0.0297411	0.0148705	0.0639744	0.0916537	4	1.20089	0.102455	0.0512274	0.0272468	0.00147161	1.58783
ATVB	6	SCV000189548	G314R	3	2.34032	0.214168	0.12365	0.903072	8.16755e-14	3	1.47317	0.0943019	0.0544452	0.93635	3.88343e-09	3	1.12851	0.0541725	0.0312765	0.387146	0.0335913	3	1.38015	0.0558104	0.0322221	0.775331	5.5527e-06	0.88068
ATVB	7	SCV000189549	N316S	NA	NA	NA	NA	NA	NA	NA	NA	NA	NA	NA	NA	NA	NA	NA	NA	NA	NA	NA	NA	NA	NA	NA	NA	0.185559
exome chip	7	SCV000189624	G324S	4	2.4749	0.538366	0.269183	0.601814	5.66097e-14	4	1.45907	0.203267	0.101633	0.709741	2.53604e-09	4	1.19396	0.0528509	0.0264254	0.732882	0.000468114	4	1.48451	0.131232	0.0656158	0.409927	7.04684e-09	0.478454
ATVB	7	SCV000189550	N330H	4	2.30994	0.369646	0.184823	0.986869	2.45291e-14	4	1.4672	0.113385	0.0566927	0.85694	1.70964e-10	4	1.19488	0.0396881	0.0198441	0.666576	0.000442208	4	1.42469	0.0853182	0.0426591	0.83937	4.60076e-08	1.44684
ATVB	7	SCV000189551	G335S	3	2.10023	0.687202	0.396756	0.485385	9.52938e-09	3	1.38858	0.240064	0.138601	0.296686	1.48158e-06	3	1.13877	0.0723697	0.0417827	0.501082	0.0237942	3	1.32021	0.195442	0.112839	0.384979	0.000140195	1.05687
exome chip	7	SCV000189625	D342N	3	2.66564	0.649925	0.375235	0.223967	3.42655e-13	3	1.55453	0.187442	0.10822	0.375751	6.70104e-10	3	1.22696	0.0291376	0.0168226	0.343096	0.000491827	3	1.48521	0.11443	0.0660659	0.431257	1.37813e-07	1.00253
ATVB	7	SCV000189552	G343S	4	1.80486	0.25183	0.125915	0.0620861	5.18552e-10	4	1.35208	0.126178	0.0630892	0.106736	1.0288e-07	4	1.09385	0.0844935	0.0422468	0.0957567	0.0784308	4	1.24385	0.10163	0.050815	0.0797879	0.000224457	1.9927
ATVB	7	SCV000189553	E353K	4	1.83148	0.25634	0.12817	0.0668764	2.07875e-09	4	1.30673	0.117389	0.0586944	0.0241267	4.58642e-06	4	1.06364	0.037194	0.018597	0.0257472	0.218568	4	1.25863	0.0848333	0.0424166	0.0970231	0.000198738	0.896511
ATVB	8	SCV000189554	V369M	3	2.49048	0.2104	0.121474	0.511661	4.74066e-15	3	1.54063	0.0697753	0.0402848	0.45078	1.76827e-10	3	1.15131	0.0503075	0.0290451	0.653745	0.0139301	3	1.40334	0.0375185	0.0216613	0.962994	2.1029e-06	1.22849
ATVB	8	SCV000189555	Q378P	4	1.82638	0.135402	0.0677009	0.0493493	6.69535e-11	4	1.25369	0.0840523	0.0420262	0.00233788	7.09635e-06	4	1.13199	0.0144659	0.00723297	0.334134	0.0101674	4	1.31488	0.0405421	0.0202711	0.253546	5.72363e-06	0.932046
exome chip	8	SCV000189626	A391T	3	2.71409	0.574277	0.331559	0.164438	3.92389e-14	3	1.57788	0.178888	0.103281	0.245023	2.27831e-10	3	1.27635	0.0704836	0.0406938	0.0708682	5.59564e-05	3	1.55474	0.11401	0.0658236	0.139196	1.04572e-08	1.04323
ATVB	8	SCV000189556	A399T	4	2.73138	0.691561	0.34578	0.109814	6.99127e-14	4	1.52032	0.279331	0.139666	0.613787	3.63873e-09	4	1.20083	0.0828178	0.0414089	0.60021	0.000493978	4	1.52133	0.135052	0.0675261	0.191443	2.45187e-09	1.03843
ATVB	9	SCV000189557	R416W	3	2.41704	0.57091	0.329615	0.702129	4.69522e-12	3	1.44657	0.152246	0.0878994	0.689571	2.75735e-08	3	1.10349	0.064062	0.0369862	0.189958	0.0814916	3	1.41636	0.159262	0.09195	0.93136	2.82661e-06	0.678501
ATVB	9	SCV000189558	L432V	4	1.97709	0.302121	0.151061	0.184172	2.67802e-11	4	1.48016	0.221089	0.110544	0.994582	3.01282e-09	4	1.11558	0.162834	0.0814172	0.254478	0.0444945	4	1.2781	0.284233	0.142117	0.170317	0.000527448	0.986927
ATVB	9	SCV000189559	L446V	3	2.23091	0.228884	0.132146	0.788258	8.42179e-13	3	1.40873	0.0941901	0.0543807	0.383953	6.50571e-08	3	1.10243	0.0875292	0.050535	0.188585	0.0876525	3	1.37164	0.0642858	0.0371154	0.70944	8.01831e-06	0.746028
ATVB	10	SCV000189560	G461C	3	2.17586	0.282442	0.163068	0.64342	4.89643e-12	3	1.32894	0.071525	0.041295	0.0674807	2.03523e-06	3	1.15637	0.0606653	0.0350251	0.723356	0.011641	3	1.39926	0.0380216	0.0219518	0.929481	2.47217e-06	0.588348
ATVB	10	SCV000189561	Y465N	3	2.12867	0.28367	0.163777	0.528896	1.33651e-11	3	1.53407	0.0716465	0.0413651	0.500822	2.35704e-10	3	1.10468	0.0879917	0.0508021	0.20233	0.0815988	3	1.30063	0.130944	0.0756006	0.279304	0.000176802	0.932072
ATVB	10	SCV000189562	V468I	3	1.99379	0.367812	0.212357	0.273574	7.31465e-10	3	1.35272	0.0812972	0.046937	0.122003	7.30346e-07	3	1.143	0.124307	0.0717684	0.563712	0.0240229	3	1.33274	0.156709	0.0904761	0.450041	6.39306e-05	0.901933
ATVB	10	SCV000189563	D472Y	4	1.80063	0.294633	0.147317	0.0467676	1.24444e-09	4	1.26764	0.11067	0.0553351	0.00423397	1.07751e-05	4	1.07664	0.0922367	0.0461183	0.0456806	0.121279	4	1.27831	0.148537	0.0742686	0.141476	7.30678e-05	0.748302
ATVB	10	SCV000189564	D492N	3	2.26933	0.363177	0.20968	0.89629	2.26741e-12	3	1.43383	0.0711396	0.0410725	0.570497	1.70502e-08	3	1.17852	0.0664938	0.0383902	0.957583	0.00474215	3	1.43962	0.124349	0.0717928	0.746112	8.44491e-07	0.610305
ATVB	10	SCV000189565	K504E	3	2.49353	0.309335	0.178594	0.507389	1.57995e-14	3	1.41266	0.0944087	0.0545069	0.410646	5.47249e-08	3	1.18191	0.0965612	0.0557496	0.909428	0.00462268	3	1.496	0.095258	0.0549973	0.368476	7.84608e-08	0.670312
ATVB	10	SCV000189566	G516D	4	2.54167	0.646156	0.323078	0.362957	2.82676e-13	4	1.57912	0.260972	0.130486	0.204078	2.17558e-10	4	1.17847	0.108843	0.0544214	0.96374	0.00157432	4	1.421	0.164579	0.0822896	0.904741	1.71886e-07	1.28671
ATVB	10	SCV000189567	V523M	3	2.05102	0.393694	0.227299	0.371001	3.02953e-10	3	1.38007	0.170998	0.0987259	0.236995	6.4597e-07	3	1.07162	0.0628659	0.0362957	0.0617316	0.212244	3	1.30431	0.108062	0.0623893	0.293269	0.000134754	0.71245
ATVB	10	SCV000189568	V524M	3	2.40586	0.488983	0.282314	0.728276	1.36602e-12	3	1.44402	0.164792	0.0951429	0.668834	3.79065e-08	3	1.07449	0.0557819	0.0322057	0.0682026	0.194958	3	1.39601	0.0972622	0.0561544	0.903586	3.68425e-06	0.659338
ATVB	10	SCV000189569	P526S	NA	NA	NA	NA	NA	NA	NA	NA	NA	NA	NA	NA	NA	NA	NA	NA	NA	NA	NA	NA	NA	NA	NA	NA	0.146317
ATVB	10	SCV000189570	V527A	3	2.17104	0.306273	0.176827	0.631821	7.33866e-12	3	1.41619	0.0711828	0.0410974	0.43292	3.74355e-08	3	1.08727	0.0706563	0.0407935	0.111399	0.136672	3	1.32939	0.128684	0.0742957	0.426642	5.89682e-05	0.485103
ATVB	10	SCV000189571	G529R	3	2.03584	0.270706	0.156292	0.33885	8.57714e-11	3	1.38577	0.101097	0.0583683	0.251826	1.96062e-07	3	1.13308	0.0635866	0.0367117	0.436022	0.0288766	3	1.3294	0.110754	0.0639437	0.42472	5.25663e-05	0.719059
ATVB, FH control	11	SCV000189572	G549D	4	1.03806	0.102464	0.051232	5.05093e-06	0.421654	4	1.01689	0.0643713	0.0321857	6.1584e-08	0.370594	4	0.961695	0.0702973	0.0351486	5.53557e-05	0.537769	4	0.978268	0.073452	0.036726	8.34711e-06	0.991524	1.03273
ATVB	12	SCV000189573	R574C	3	2.46857	0.185425	0.107055	0.562383	5.45477e-15	3	1.4869	0.0845801	0.0488324	0.928491	1.93758e-09	3	1.19038	0.0479204	0.0276669	0.78509	0.00269403	3	1.45001	0.0379977	0.021938	0.663291	3.38658e-07	0.556021
ATVB	12	SCV000189574	H583D	3	1.19086	0.104001	0.0600448	0.000260939	0.040411	3	1.11727	0.0312584	0.018047	5.29364e-05	0.0211586	3	0.943312	0.0525283	0.0303272	0.00010907	0.400732	3	1.01098	0.0804777	0.0464638	0.00020521	0.657103	0.527367
ATVB	12	SCV000189575	D589H	3	2.41056	0.287467	0.165969	0.710933	5.24942e-14	3	1.47829	0.104854	0.0605376	0.986669	3.55456e-09	3	1.18245	0.0348884	0.0201428	0.899105	0.00369733	3	1.42958	0.0540969	0.0312329	0.822421	7.93693e-07	0.586089
ATVB, exome chip	12	SCV000189576	G592E	6	2.23682	0.383243	0.156458	0.757771	2.78561e-15	6	1.48841	0.101792	0.0415565	0.861175	2.27797e-13	6	1.10126	0.0944043	0.0385404	0.101106	0.0195251	6	1.35205	0.191528	0.0781911	0.484409	3.679e-07	0.970169
ATVB	12	SCV000189577	R595Q	3	2.10549	0.468836	0.270682	0.484106	2.96463e-10	3	1.43643	0.198285	0.11448	0.610011	9.51755e-08	3	1.10895	0.0846164	0.0488533	0.229473	0.0704602	3	1.32692	0.152033	0.0877762	0.415371	7.65856e-05	0.809602
ATVB	12	SCV000189578	A606S	3	2.52269	0.216103	0.124767	0.441343	2.83686e-15	3	1.57533	0.0509348	0.0294072	0.237737	3.70831e-11	3	1.1952	0.0258001	0.0148957	0.716138	0.00208099	3	1.45779	0.0827047	0.0477496	0.608201	3.08068e-07	0.608289
ATVB, exome chip	13	SCV000189579	E626K	4	1.79497	0.327843	0.163922	0.0432571	2.40415e-09	4	1.36866	0.191655	0.0958276	0.142771	1.48471e-07	4	1.13416	0.0778457	0.0389229	0.45872	0.0110078	4	1.23589	0.115433	0.0577163	0.0535527	0.000371163	1.70867
ATVB	13	SCV000189580	D651N	3	1.91834	0.177407	0.102426	0.170599	5.21794e-10	3	1.37984	0.140334	0.0810219	0.229817	4.1508e-07	3	1.11768	0.100342	0.0579323	0.299555	0.0544401	3	1.24895	0.0192505	0.0111143	0.106259	0.000836218	0.826319
ATVB	13	SCV000189581	M652V	3	2.40244	0.453972	0.262101	0.736248	7.99018e-13	3	1.41287	0.114042	0.0658421	0.414827	6.81555e-08	3	1.16019	0.0672487	0.0388261	0.777115	0.010155	3	1.47646	0.225496	0.13019	0.500404	6.94588e-07	0.631271
ATVB, exome chip	14	SCV000189582	P685L	4	1.20842	0.132162	0.066081	4.78222e-05	0.0123275	4	1.13977	0.0755729	0.0377864	1.44423e-05	0.00509587	4	1.00012	0.0336716	0.0168358	0.000476865	0.863849	4	1.02975	0.0649604	0.0324802	4.98835e-05	0.39676	0.559876
ATVB	14	SCV000189583	G701S	4	1.88658	0.347365	0.173683	0.0960467	3.03587e-10	4	1.44474	0.179771	0.0898853	0.647025	2.782e-09	4	1.08887	0.130729	0.0653647	0.118301	0.0888364	4	1.20567	0.155518	0.0777591	0.0260828	0.00175388	1.25575
ATVB	14	SCV000189584	R706G	3	2.57593	0.510951	0.294998	0.350665	1.09537e-13	3	1.43902	0.165343	0.0954607	0.625905	4.72608e-08	3	1.20643	0.109764	0.0633721	0.581516	0.00174499	3	1.51954	0.236757	0.136692	0.277401	1.79463e-07	0.628951
ATVB	14	SCV000189585	R709K	4	2.10264	0.395057	0.197528	0.405947	4.09894e-12	4	1.41302	0.173452	0.0867261	0.373843	9.34898e-09	4	1.20181	0.100933	0.0504664	0.601986	0.000424835	4	1.38596	0.122318	0.061159	0.771989	4.23442e-07	1.09875
ATVB	15	SCV000189586	T726I	4	2.98441	0.506674	0.253337	0.0182248	5.15019e-18	4	1.55338	0.161416	0.0807079	0.406361	1.01394e-11	4	1.23703	0.0615069	0.0307535	0.214939	4.3782e-05	4	1.64688	0.175151	0.0875756	0.0107109	2.33826e-11	0.386325
ATVB, exome chip	15	SCV000189587	R744Q	3	2.32518	0.158434	0.0914722	0.945872	6.46958e-14	3	1.52856	0.0137408	0.00793326	0.541946	2.10173e-10	3	1.15543	0.0299035	0.0172648	0.707855	0.011421	3	1.39556	0.0737662	0.0425889	0.899546	3.2788e-06	0.912469
ATVB	15	SCV000189588	D748N	3	2.5114	0.430945	0.248806	0.472753	7.94243e-14	3	1.42298	0.130356	0.075261	0.490914	5.43956e-08	3	1.22984	0.0823912	0.0475686	0.326279	0.000526089	3	1.54978	0.183157	0.105746	0.160777	2.82634e-08	0.620022
ATVB	15	SCV000189589	T761M	3	2.34443	0.462531	0.267043	0.893636	2.6484e-12	3	1.41797	0.128073	0.0739433	0.453301	6.55448e-08	3	1.19002	0.120835	0.0697641	0.798004	0.00373753	3	1.46358	0.223903	0.129271	0.583467	1.07588e-06	0.633434
ATVB	16	SCV000189590	S786G	3	2.50216	0.698369	0.403203	0.507519	1.08699e-11	3	1.4416	0.0962733	0.0555834	0.639399	1.55809e-08	3	1.20591	0.153582	0.0886708	0.600524	0.0024002	3	1.52302	0.351769	0.203094	0.290754	1.05425e-06	0.587336
ATVB	17	SCV000189591	V800I	3	2.38117	0.501367	0.289464	0.794049	2.62646e-12	3	1.35536	0.0766196	0.0442363	0.129317	6.22454e-07	3	1.18738	0.062849	0.0362859	0.828816	0.0032067	3	1.50947	0.21131	0.122	0.317292	1.75746e-07	0.694879
exome chip	17	SCV000189627	R814Q	3	2.04558	0.178842	0.103255	0.353929	2.75529e-11	3	1.42175	0.0398157	0.0229876	0.471736	2.36704e-08	3	1.10077	0.105932	0.0611599	0.183767	0.0957924	3	1.26148	0.121144	0.0699424	0.141333	0.000711021	0.88041
ATVB	17	SCV000189592	V827I	4	2.34034	0.257321	0.12866	0.865617	1.32845e-15	4	1.50947	0.158887	0.0794436	0.665961	7.57404e-11	4	1.26992	0.0859378	0.0429689	0.0518351	8.8899e-06	4	1.44109	0.148229	0.0741144	0.666144	6.51122e-08	1.40723
FH	17	SCV000189628	Y828C	4	1.83379	0.469443	0.234722	0.0652409	1.90479e-08	4	1.27899	0.126097	0.0630484	0.00753845	4.63947e-06	4	1.42396	0.182828	0.0914141	3.65765e-05	2.74792e-08	4	1.38093	0.20287	0.101435	0.762041	2.74676e-06	1.19998
					complementation_"total LDL signal"						complementation_"LDL concentration"						complementation_"seg. number"						complementation_"seg. area"					complementation
source	exon		amino acid chg	n (exp.)	Mean	SD	SEM	T-Test LDLR	T-Test GFP	n (exp.)	Mean	SD	SEM	T-Test LDLR	T-Test GFP	n (exp.)	Mean	SD	SEM	T-Test LDLR	T-Test GFP	n (exp.)	Mean	SD	SEM	T-Test LDLR	T-Test GFP	"GFP expression"
CTRL	NA	NA	GFP-ctrl	27	1.00288	0.240372	0.0462597	9.94277e-20	NA	27	1.09285	0.132117	0.025426	5.45384e-16	NA	27	0.940959	0.122784	0.0236298	1.12756e-11	NA	27	0.953813	0.149702	0.0288102	7.56702e-22	NA	2.64249
LDLR-WT	NA	NA	LDLR {0-10%}	21	3.05112	0.836377	0.182512	NA	6.20603e-16	21	1.47263	0.288803	0.0630219	NA	2.21743e-07	21	1.34786	0.287862	0.0628167	NA	3.32423e-08	21	1.89749	0.406762	0.0887627	NA	1.13912e-14	0.1
LDLR-WT	NA	NA	LDLR {0-20%}	32	6.55468	2.97839	0.52651	NA	1.38417e-13	32	1.96005	0.410053	0.0724877	NA	5.56647e-15	32	1.52113	0.392928	0.0694606	NA	7.8056e-10	32	2.64186	0.727542	0.128612	NA	5.55395e-17	0.2
LDLR-WT	NA	NA	LDLR {0-30%}	32	9.91905	4.29833	0.759844	NA	2.48593e-15	32	2.32287	0.472737	0.0835689	NA	8.29729e-19	32	1.65122	0.427231	0.0755244	NA	1.85978e-11	32	3.21299	0.880386	0.155632	NA	6.43864e-19	0.3
LDLR-WT	NA	NA	LDLR {0-50%}	31	12.7751	5.60527	1.00674	NA	1.88931e-15	31	2.54917	0.533853	0.0958828	NA	1.16175e-19	31	1.79999	0.476582	0.0855966	NA	1.25636e-12	31	3.74052	1.11684	0.20059	NA	2.42827e-18	0.5
LDLR-WT	NA	NA	LDLR {0-70%}	29	13.3375	5.8476	1.08587	NA	2.54102e-15	29	2.57772	0.45101	0.0837505	NA	1.0854e-22	29	1.8312	0.518505	0.0962839	NA	7.64838e-12	29	3.87431	1.19952	0.222744	NA	1.20912e-17	0.7
LDLR-WT	NA	NA	LDLR {0-100%}	33	13.8526	5.81794	1.01277	NA	1.61857e-16	33	2.67056	0.569473	0.0991325	NA	2.37493e-20	33	1.9285	0.532531	0.0927017	NA	2.71369e-13	33	4.00678	1.22234	0.212782	NA	1.17418e-18	1
ATVB	1	SCV000189524	G20R	2	4.73227	0.490774	0.34703	0.218021	9.82191e-18	2	1.98085	0.266693	0.18858	0.726124	2.63566e-09	2	1.18778	0.609909	0.43127	0.159187	0.0553906	2	2.4277	0.669571	0.473458	0.412616	7.62405e-11	0.621954
ATVB	2	SCV000189525	G48D	2	10.2906	1.37472	0.972074	0.0253892	2.7976e-24	2	2.45511	0.564169	0.398928	0.28875	1.79532e-11	2	1.53968	0.00574208	0.00406027	0.79699	2.78425e-07	2	3.22577	0.424881	0.300436	0.348011	7.89911e-17	0.915274
ATVB	2	SCV000189526	T62M	2	6.74238	0.549555	0.388594	0.96051	2.20608e-22	2	2.06145	0.00409619	0.00289644	0.915292	9.37444e-11	2	1.55993	0.158746	0.11225	0.852093	2.68221e-07	2	2.84925	0.411734	0.29114	0.915278	5.84019e-15	0.734446
ATVB	3	SCV000189527	R81C	5	5.40319	2.65108	1.1856	0.241124	3.95667e-10	5	1.96625	0.530511	0.237252	0.561577	1.00603e-08	5	1.48157	0.474336	0.21213	0.503259	8.65206e-06	5	2.5546	0.550477	0.246181	0.404488	3.10974e-14	1.00619
exome chip	3	SCV000189619	E101K	4	3.50596	0.106691	0.0533457	0.00625792	1.09926e-18	4	1.71319	0.049156	0.024578	0.104085	4.4017e-10	4	1.37307	0.128539	0.0642697	0.24334	3.69806e-07	4	1.9092	0.127947	0.0639737	0.00728169	7.68484e-13	0.51382
ATVB	4	SCV000189528	P105L	5	6.84099	3.03692	1.35815	0.872496	1.1584e-11	5	2.73712	1.64132	0.734022	0.0623447	5.36653e-06	5	1.52622	0.44007	0.196805	0.653674	1.06665e-06	5	2.81621	0.656246	0.293482	0.960924	1.57542e-14	0.673059
ATVB	4	SCV000189529	D118Y	5	5.654	1.74453	0.780179	0.323201	8.19002e-15	5	2.04757	0.349346	0.156232	0.819998	4.10593e-12	5	1.54445	0.749116	0.335015	0.750691	0.0002316	5	2.77806	0.709189	0.317159	0.938442	1.22998e-13	0.723524
ATVB	4	SCV000189530	D131G	3	3.93235	0.244111	0.140937	0.0365112	4.03937e-18	3	1.89843	0.218913	0.126389	0.46388	3.32385e-10	3	1.31285	0.16558	0.0955975	0.207432	4.32549e-05	3	2.03807	0.244519	0.141173	0.0427582	6.72489e-12	1.14404
ATVB	4	SCV000189531	G137S	2	6.872	0.967023	0.683789	0.894389	6.28301e-21	2	2.07542	0.304372	0.215224	0.949556	4.98469e-10	2	1.68887	0.113206	0.0800486	0.794172	6.04918e-09	2	2.85998	0.487848	0.34496	0.896627	1.46587e-14	0.850525
ATVB	4	SCV000189532	G137V	5	4.37573	1.84223	0.823871	0.0301396	7.80646e-11	5	1.90993	0.270379	0.120917	0.379789	1.05612e-11	5	1.311	0.371344	0.16607	0.11917	0.000173212	5	2.16741	0.609564	0.272605	0.0388081	1.51949e-10	0.707732
exome chip	4	SCV000189620	D168N	3	4.30395	0.86425	0.498975	0.0697733	5.18609e-16	3	1.78256	0.255662	0.147607	0.249482	1.52344e-08	3	1.27255	0.0535724	0.03093	0.152822	8.93599e-05	3	1.97053	0.171638	0.0990953	0.0279863	1.04493e-11	1.0938
ATVB	4	SCV000189533	S177L	4	2.13516	0.552656	0.276328	0.000196656	4.62889e-08	4	1.43585	0.314136	0.157068	0.00793967	0.00042088	4	1.09277	0.062202	0.031101	0.014153	0.0229357	4	1.29517	0.182241	0.0911203	2.8994e-05	0.000263082	0.844561
ATVB	4	SCV000189534	P181R	2	6.72389	1.13068	0.79951	0.970105	6.7452e-20	2	1.81947	0.325912	0.230455	0.404241	2.13487e-07	2	1.9097	0.441284	0.312035	0.31622	1.39326e-09	2	2.88599	0.199677	0.141193	0.849952	3.54701e-16	0.995509
ATVB	4	SCV000189535	Q182R	2	4.66085	1.90749	1.3488	0.206909	7.35508e-12	2	2.0274	0.244991	0.173235	0.834184	7.45677e-10	2	1.09923	0.33981	0.240282	0.0838977	0.126814	2	2.16841	0.597909	0.422785	0.167746	1.69486e-09	1.02787
ATVB	4	SCV000189536	C197R	5	3.28015	0.419047	0.187404	0.00133203	4.0154e-17	5	1.55611	0.19888	0.0889417	0.0133355	2.22974e-07	5	1.19233	0.251772	0.112596	0.0284079	0.00140152	5	1.88683	0.251216	0.112347	0.00254985	1.65267e-12	0.901198
exome chip	4	SCV000189621	G219D	3	9.53059	5.29242	3.05558	0.0603299	1.58199e-10	3	2.43443	0.367639	0.212257	0.219473	6.06925e-14	3	1.58377	0.45195	0.260933	0.902298	9.4426e-07	3	3.0794	1.20785	0.697351	0.493874	1.26065e-10	0.977695
ATVB	4	SCV000189537	D221G	6	2.81755	0.493753	0.201574	0.000109723	1.38877e-14	6	1.48595	0.200123	0.0816998	0.00837982	1.24055e-06	6	1.20459	0.180284	0.0736008	0.0190729	0.000130329	6	1.79516	0.231801	0.0946324	0.000380388	1.79447e-12	0.912361
ATVB	4	SCV000189538	C222Y	5	1.77556	0.476771	0.213218	1.40131e-05	4.31217e-06	5	1.25728	0.172706	0.0772363	0.000256832	0.0206456	5	1.10051	0.185908	0.0831405	0.00792744	0.0196451	5	1.36609	0.243721	0.108995	1.13016e-05	1.65516e-05	0.776977
ATVB, exome chip	5	SCV000189539	R237H	2	8.56041	0.299117	0.211508	0.226863	2.89825e-26	2	2.47058	0.354528	0.250689	0.262178	5.26844e-13	2	1.52213	0.109857	0.0776808	0.750651	5.98858e-07	2	2.91563	0.728869	0.515388	0.802189	2.81922e-13	0.817645
exome chip	5	SCV000189622	R253W	4	6.93634	0.951364	0.475682	0.806344	5.47615e-23	4	2.21211	0.24752	0.12376	0.621682	1.67193e-14	4	1.51145	0.0570481	0.028524	0.616146	6.08348e-10	4	2.67706	0.148307	0.0741534	0.693857	2.27352e-19	0.879317
ATVB	5	SCV000189540	M264L	5	5.48027	2.52121	1.12752	0.266892	9.1087e-11	5	1.91098	0.306902	0.137251	0.385332	3.63429e-11	5	1.5333	0.551607	0.246686	0.690849	1.13888e-05	5	2.59983	0.917663	0.410391	0.526582	2.32023e-10	1.02222
exome chip	5	SCV000189623	D266E	5	6.66638	2.2845	1.02166	0.99943	2.9566e-14	5	2.12004	0.18218	0.0814735	0.909323	1.50007e-15	5	1.62241	0.417465	0.186696	0.963542	3.49823e-08	5	2.85447	0.564748	0.252563	0.857526	5.32018e-16	1.05818
ATVB, exome chip	5	SCV000189541	G269D	3	5.60926	1.98976	1.14879	0.417954	2.01141e-13	3	2.10878	0.36382	0.210052	0.932158	3.03851e-11	3	1.22914	0.39327	0.227055	0.1181	0.00572876	3	2.47672	0.569233	0.328647	0.386718	1.69046e-12	0.876139
ATVB	6	SCV000189542	C276S	5	4.89655	1.01343	0.453221	0.0806098	5.96351e-18	5	1.926	0.427234	0.191065	0.435956	1.30864e-09	5	1.48737	0.134261	0.0600435	0.490537	4.73294e-10	5	2.34802	0.395886	0.177045	0.12186	6.65726e-15	1.2541
ATVB, exome chip	6	SCV000189543	E277K	3	8.52604	0.304238	0.175652	0.147682	5.15924e-29	3	2.48004	0.19875	0.114748	0.159049	5.67548e-16	3	1.64055	0.289841	0.16734	0.910346	7.53131e-09	3	3.029	0.507284	0.29288	0.541046	1.96123e-16	1.00512
ATVB	6	SCV000189544	F282L	5	2.81562	0.671415	0.300266	0.000356342	2.9547e-12	5	1.52781	0.296508	0.132602	0.0104741	6.49949e-06	5	1.26161	0.104635	0.0467943	0.0593958	6.27583e-06	5	1.73755	0.254935	0.114011	0.000583686	1.15944e-10	1.06968
ATVB	6	SCV000189545	H285Y	3	5.12237	2.875	1.65988	0.251737	3.57762e-09	3	1.94718	0.389089	0.224641	0.586023	2.77724e-09	3	1.18981	0.326646	0.188589	0.0834646	0.00958417	3	2.27719	0.935739	0.540249	0.183293	3.33008e-08	0.985108
ATVB	6	SCV000189546	M298V	1	6.48791	NA	NA	NA	NA	1	1.98318	NA	NA	NA	NA	1	1.94303	NA	NA	NA	NA	1	3.24716	NA	NA	NA	NA	0.890447
ATVB	6	SCV000189547	R303Q	3	7.86239	0.482568	0.278611	0.347718	5.5611e-27	3	2.22305	0.256789	0.148257	0.638974	2.96829e-13	3	1.70169	0.368977	0.213029	0.715053	7.77418e-09	3	3.1366	0.258649	0.149331	0.362277	1.98308e-19	0.79292
ATVB	6	SCV000189548	G314R	2	5.09885	2.95838	2.09189	0.329618	1.10531e-09	2	1.87573	0.220527	0.155936	0.503676	2.02423e-08	2	1.2665	0.276041	0.19519	0.235852	0.0022576	2	2.19139	0.897601	0.6347	0.190809	5.19126e-08	1.41445
ATVB	7	SCV000189549	N316S	3	1.36417	0.503662	0.290789	0.000173036	0.0349945	3	1.12668	0.189437	0.109372	0.000903746	0.688059	3	1.06759	0.114323	0.0660047	0.0253292	0.0996985	3	1.12173	0.21835	0.126065	5.06389e-05	0.087102	0.182013
exome chip	7	SCV000189624	G324S	4	5.02289	0.950716	0.475358	0.142851	2.52612e-18	4	2.13611	0.163378	0.081689	0.864043	1.04495e-14	4	1.36525	0.101317	0.0506585	0.227805	3.47962e-07	4	2.33044	0.394464	0.197232	0.147999	4.85784e-14	0.379267
ATVB	7	SCV000189550	N330H	2	7.38642	2.1723	1.53605	0.647618	1.17967e-16	2	2.23004	0.0875852	0.0619321	0.683516	3.18685e-12	2	1.32957	0.129913	0.0918622	0.327523	0.000194414	2	2.82558	0.951065	0.672504	0.958419	2.24235e-11	0.676261
ATVB	7	SCV000189551	G335S	3	7.15336	0.816468	0.471388	0.701193	1.66638e-23	3	2.37969	0.360261	0.207997	0.301873	1.39695e-13	3	1.44551	0.32272	0.186322	0.483819	4.55743e-06	3	2.67554	0.544867	0.314579	0.735351	5.13172e-14	0.930789
exome chip	7	SCV000189625	D342N	4	6.2505	0.822578	0.411289	0.73514	6.21844e-24	4	1.97495	0.0978647	0.0489323	0.616343	2.70805e-14	4	1.44013	0.148719	0.0743597	0.42619	2.27899e-08	4	2.63678	0.412996	0.206498	0.663298	9.36862e-17	0.994363
ATVB	7	SCV000189552	G343S	3	5.67952	0.740967	0.427798	0.439157	8.59642e-21	3	2.17103	0.465437	0.26872	0.786471	1.06707e-10	3	1.61178	0.52026	0.300372	0.993777	1.65485e-06	3	2.65869	0.711161	0.410589	0.706147	2.49109e-12	0.682269
ATVB	7	SCV000189553	E353K	4	4.43167	1.6839	0.841951	0.0532942	9.13945e-12	4	1.74356	0.230223	0.115112	0.13773	3.28995e-09	4	1.46278	0.206464	0.103232	0.464386	5.18906e-08	4	2.56457	0.749094	0.374547	0.481741	1.23373e-11	0.202203
ATVB	8	SCV000189554	V369M	3	6.76763	1.79526	1.03649	0.937009	8.6773e-17	3	2.22142	0.31078	0.179429	0.644799	1.00894e-12	3	1.68917	0.357156	0.206204	0.753755	8.33672e-09	3	2.96565	0.564111	0.32569	0.660283	1.65111e-15	0.856979
ATVB	8	SCV000189555	Q378P	3	6.89081	2.65095	1.53053	0.864848	2.28925e-13	3	2.22568	0.354293	0.204551	0.635035	2.53357e-12	3	1.43885	0.135136	0.0780206	0.45946	3.57219e-07	3	2.99144	0.891299	0.514592	0.623789	1.42457e-12	0.711832
exome chip	8	SCV000189626	A391T	1	7.88481	NA	NA	NA	NA	1	2.07638	NA	NA	NA	NA	1	1.93411	NA	NA	NA	NA	1	3.69789	NA	NA	NA	NA	0.900597
ATVB	8	SCV000189556	A399T	3	6.007	1.68984	0.975631	0.609967	9.38199e-16	3	2.25442	0.242996	0.140294	0.558348	1.14713e-13	3	1.43693	0.04892	0.028244	0.453199	1.93929e-07	3	2.53475	0.575667	0.332362	0.476589	8.03082e-13	0.633802
ATVB	9	SCV000189557	R416W	1	7.02368	NA	NA	NA	NA	1	2.22876	NA	NA	NA	NA	1	1.68265	NA	NA	NA	NA	1	3.26163	NA	NA	NA	NA	0.522265
ATVB	9	SCV000189558	L432V	2	5.24532	0.0337262	0.023848	0.362573	5.41634e-20	2	2.16515	0.233256	0.164937	0.834189	3.50487e-11	2	1.13945	0.160949	0.113808	0.106919	0.038383	2	2.25951	0.0893107	0.0631522	0.229348	2.27227e-12	1.00971
ATVB	9	SCV000189559	L446V	1	6.69842	NA	NA	NA	NA	1	2.2441	NA	NA	NA	NA	1	1.4147	NA	NA	NA	NA	1	2.96473	NA	NA	NA	NA	0.252709
ATVB	10	SCV000189560	G461C	1	6.3275	NA	NA	NA	NA	1	2.06413	NA	NA	NA	NA	1	1.66572	NA	NA	NA	NA	1	2.94469	NA	NA	NA	NA	0.54162
ATVB	10	SCV000189561	Y465N	2	7.15157	2.96846	2.09902	0.760848	1.404e-13	2	2.31234	0.0397973	0.0281409	0.510883	5.45695e-13	2	1.30839	0.494488	0.349656	0.303707	0.00296786	2	2.92592	0.976709	0.690638	0.788201	1.00785e-11	2.01203
ATVB	10	SCV000189562	V468I	2	6.87938	1.55658	1.10067	0.891179	2.8366e-18	2	2.37918	0.0495829	0.0350604	0.39045	1.59442e-13	2	1.23691	0.292432	0.206781	0.19953	0.00524864	2	2.94228	0.697236	0.49302	0.756958	1.25913e-13	0.933006
ATVB	10	SCV000189563	D472Y	5	6.92742	1.19808	0.535799	0.79275	1.58666e-21	5	2.34019	0.341399	0.152678	0.257993	3.40116e-15	5	1.65644	0.325626	0.145625	0.820946	6.26036e-10	5	2.95449	0.504786	0.225747	0.601742	1.75496e-17	0.541747
ATVB	10	SCV000189564	D492N	1	7.38604	NA	NA	NA	NA	1	2.13974	NA	NA	NA	NA	1	2.06168	NA	NA	NA	NA	1	3.3454	NA	NA	NA	NA	0.645831
ATVB	10	SCV000189565	K504E	1	6.11698	NA	NA	NA	NA	1	1.79611	NA	NA	NA	NA	1	2.33487	NA	NA	NA	NA	1	3.29196	NA	NA	NA	NA	0.805465
ATVB	10	SCV000189566	G516D	3	6.72666	0.251477	0.14519	0.961466	6.01063e-26	3	2.2067	0.231783	0.13382	0.682147	2.52371e-13	3	1.50139	0.0617892	0.035674	0.632911	2.13497e-08	3	2.63282	0.150059	0.0866368	0.643835	3.44189e-17	0.639548
ATVB	10	SCV000189567	V523M	2	6.36581	0.134509	0.0951126	0.846709	1.38412e-22	2	2.17949	0.0368352	0.0260464	0.79956	7.64137e-12	2	1.69552	0.296433	0.209609	0.778041	2.63032e-08	2	2.97644	2.12147e-05	1.5001e-05	0.695056	4.93881e-17	0.583515
ATVB	10	SCV000189568	V524M	1	6.86418	NA	NA	NA	NA	1	2.07194	NA	NA	NA	NA	1	1.87878	NA	NA	NA	NA	1	3.18659	NA	NA	NA	NA	0.314299
ATVB	10	SCV000189569	P526S	NA	NA	NA	NA	NA	NA	NA	NA	NA	NA	NA	NA	NA	NA	NA	NA	NA	NA	NA	NA	NA	NA	NA	NA	0.0894209
ATVB	10	SCV000189570	V527A	1	7.21162	NA	NA	NA	NA	1	2.04597	NA	NA	NA	NA	1	1.89147	NA	NA	NA	NA	1	3.29508	NA	NA	NA	NA	0.302553
ATVB	10	SCV000189571	G529R	2	6.29481	0.230247	0.162809	0.811072	2.64657e-22	2	2.26673	0.258054	0.182472	0.60531	6.06277e-12	2	1.18026	0.111715	0.0789943	0.138854	0.0127422	2	2.49728	0.00699041	0.00494297	0.496467	3.82753e-14	0.98108
ATVB	11	SCV000189572	G549D	4	0.972751	0.113252	0.0566261	7.72229e-06	0.808969	4	1.09201	0.129149	0.0645746	0.000108728	0.990613	4	0.929016	0.0582259	0.029113	0.00172273	0.85117	4	0.920539	0.0729835	0.0364918	7.29234e-07	0.668743	0.660851
ATVB	12	SCV000189573	R574C	2	5.15983	2.27772	1.61059	0.343028	8.02187e-12	2	2.03126	0.02611	0.0184626	0.842641	1.88041e-10	2	1.79908	0.315356	0.22299	0.524529	2.70124e-09	2	2.84414	0.743955	0.526055	0.925457	8.44502e-13	0.556549
ATVB	12	SCV000189574	H583D	3	3.18701	0.983398	0.567765	0.00938734	5.6325e-11	3	1.64942	0.195847	0.113072	0.102983	3.29697e-07	3	1.34055	0.54041	0.312006	0.274436	0.00150918	3	2.27132	0.635219	0.366744	0.163958	1.80478e-10	0.384874
ATVB	12	SCV000189575	D589H	2	5.71455	2.0538	1.45226	0.546328	7.12818e-14	2	2.00311	0.361665	0.255736	0.778277	4.71161e-09	2	1.97648	0.588599	0.416202	0.227495	3.69884e-09	2	3.24757	0.324893	0.229734	0.322696	1.68904e-17	0.527273
ATVB, exome chip	12	SCV000189576	G592E	5	6.92606	1.90123	0.850257	0.799314	1.01135e-16	5	2.26708	0.226807	0.101431	0.417544	1.99835e-16	5	1.43095	0.176382	0.0788805	0.322762	1.47937e-08	5	2.59981	0.493612	0.22075	0.491354	2.33602e-15	0.637286
ATVB	12	SCV000189577	R595Q	2	7.58819	1.63683	1.15741	0.556294	3.45011e-19	2	2.44422	0.294972	0.208577	0.295274	3.69116e-13	2	1.29264	0.274671	0.194222	0.272226	0.00111619	2	2.79897	0.548178	0.387621	0.995538	7.72029e-14	1.84786
ATVB	12	SCV000189578	A606S	2	7.77984	5.77181	4.08129	0.51755	9.53225e-09	2	2.05033	0.235528	0.166544	0.888861	4.09806e-10	2	1.56423	0.437482	0.309346	0.865916	3.72444e-06	2	3.67049	1.6461	1.16397	0.0848578	3.87725e-11	0.356182
ATVB, exome chip	13	SCV000189579	E626K	3	5.47912	0.999438	0.577026	0.354324	1.43975e-18	3	2.06823	0.201985	0.116616	0.916846	3.36764e-12	3	1.36198	0.437018	0.252312	0.304544	0.000272373	3	2.3583	0.638909	0.368874	0.242755	4.73672e-11	0.78187
ATVB	13	SCV000189580	D651N	2	6.28543	0.63241	0.447182	0.80661	3.86295e-21	2	2.32362	0.126176	0.0892197	0.489688	6.31794e-13	2	1.24026	0.115108	0.0813934	0.20035	0.0024973	2	2.63248	0.271723	0.192137	0.705719	2.13121e-14	0.686272
ATVB	13	SCV000189581	M652V	2	6.97944	1.02961	0.728047	0.840132	7.51177e-21	2	2.88204	0.330093	0.233411	0.0223073	6.83099e-16	2	1.12813	0.639041	0.45187	0.111215	0.149523	2	2.47387	0.735483	0.520065	0.47377	9.92157e-11	0.507568
ATVB, exome chip	14	SCV000189582	P685L	3	3.4652	0.414165	0.239119	0.0155515	1.88309e-15	3	1.64131	0.180365	0.104134	0.0968413	3.509e-07	3	1.30006	0.518317	0.29925	0.208926	0.00308481	3	2.27463	0.344529	0.198914	0.157387	4.00185e-13	0.415063
ATVB	14	SCV000189583	G701S	3	6.76769	1.67349	0.96619	0.936801	2.02356e-17	3	2.26135	0.131838	0.0761167	0.538814	1.43042e-14	3	1.29631	0.123584	0.071351	0.183098	5.44296e-05	3	2.68431	0.535765	0.309324	0.752955	3.68159e-14	1.84388
ATVB	14	SCV000189584	R706G	2	6.39093	1.53035	1.08212	0.860492	1.9708e-17	2	2.50839	0.257875	0.182345	0.21594	7.81704e-14	2	1.07337	0.451116	0.318987	0.0723705	0.234245	2	2.49794	0.312767	0.22116	0.499103	2.39162e-13	0.474054
ATVB	14	SCV000189585	R709K	2	6.42048	1.92251	1.35942	0.875925	7.48567e-16	2	2.07742	0.159981	0.113124	0.95415	1.19006e-10	2	1.68722	0.135551	0.0958493	0.79868	7.22232e-09	2	2.94036	0.548323	0.387723	0.758442	1.31425e-14	0.725678
ATVB	15	SCV000189586	T726I	4	5.6864	1.85919	0.929594	0.402735	4.37115e-15	4	2.0765	0.349071	0.174536	0.959693	1.50231e-12	4	1.42462	0.203377	0.101688	0.385716	1.18034e-07	4	2.63427	0.676226	0.338113	0.667585	1.55194e-13	0.267828
ATVB, exome chip	15	SCV000189587	R744Q	3	7.26115	1.89515	1.09416	0.646009	3.26421e-17	3	2.38752	0.0953737	0.0550641	0.280404	7.03429e-16	3	1.43928	0.13959	0.0805925	0.460666	3.69761e-07	3	2.77031	0.417171	0.240854	0.932598	7.18413e-16	1.06148
ATVB	15	SCV000189588	D748N	3	7.63176	1.12489	0.649456	0.450495	2.61456e-22	3	2.57201	0.340022	0.196312	0.0868096	2.69269e-15	3	1.10548	0.446197	0.257612	0.0430683	0.118775	3	2.82148	0.596056	0.344133	0.957384	2.21904e-14	0.44767
ATVB	15	SCV000189589	T761M	1	9.18097	NA	NA	NA	NA	1	2.7572	NA	NA	NA	NA	1	1.42003	NA	NA	NA	NA	1	3.49557	NA	NA	NA	NA	0.127372
ATVB	16	SCV000189590	S786G	2	7.1064	0.114812	0.0811843	0.776233	4.38056e-24	2	2.48679	0.00755812	0.0053444	0.238109	2.19996e-14	2	1.2588	0.285848	0.202125	0.22609	0.00290147	2	2.84763	0.392626	0.277629	0.918085	4.63598e-15	0.542582
ATVB	17	SCV000189591	V800I	1	9.4315	NA	NA	NA	NA	1	3.46729	NA	NA	NA	NA	1	0.461164	NA	NA	NA	NA	1	2.3082	NA	NA	NA	NA	0.75627
exome chip	17	SCV000189627	R814Q	3	7.58248	1.04562	0.603689	0.473284	9.5435e-23	3	2.47396	0.252142	0.145574	0.167385	1.90094e-15	3	1.5121	0.0851571	0.0491655	0.666501	1.74506e-08	3	2.691	0.329827	0.190426	0.763678	3.26731e-16	1.04797
ATVB	17	SCV000189592	V827I	3	6.61654	1.77661	1.02573	0.969714	1.38339e-16	3	2.08902	0.176185	0.101721	0.978382	1.3273e-12	3	1.51725	0.361731	0.208845	0.6888	1.07709e-06	3	2.86019	0.535777	0.309331	0.874667	3.31174e-15	1.29138
FH	17	SCV000189628	Y828C	3	5.94946	1.66019	0.958508	0.578995	8.82671e-16	3	2.52988	0.516713	0.298324	0.125059	4.93147e-13	3	1.58544	0.272688	0.157437	0.905466	2.6615e-08	3	2.44586	0.499071	0.288139	0.34095	5.88806e-13	0.577238
